# Supplementary material for: Thallium(I) treatment induces nucleolar stress to stop protein synthesis and cell growth
Source: PubMed Central journal article supplement (PMC6502789; doi:10.1038/s41598-019-43413-1), 2019-05-06

Online Supplemental File

# **Thallium(I) treatment induces nucleolar stress to stop protein synthesis and cell growth**

Yi-Ting Chou, Kai-Yin Lo\*

Department of Agricultural Chemistry, National Taiwan University, Taipei, Taiwan

\*corresponding author:

Kai-Yin Lo, PhD  
Department of Agricultural Chemistry  
College of Bioresources and Agriculture  
National Taiwan University  
Taipei 10617, Taiwan

TEL: 886-2-33669440  
email: [kaiyin@ntu.edu.tw](mailto:kaiyin@ntu.edu.tw)

**Fig 3A**

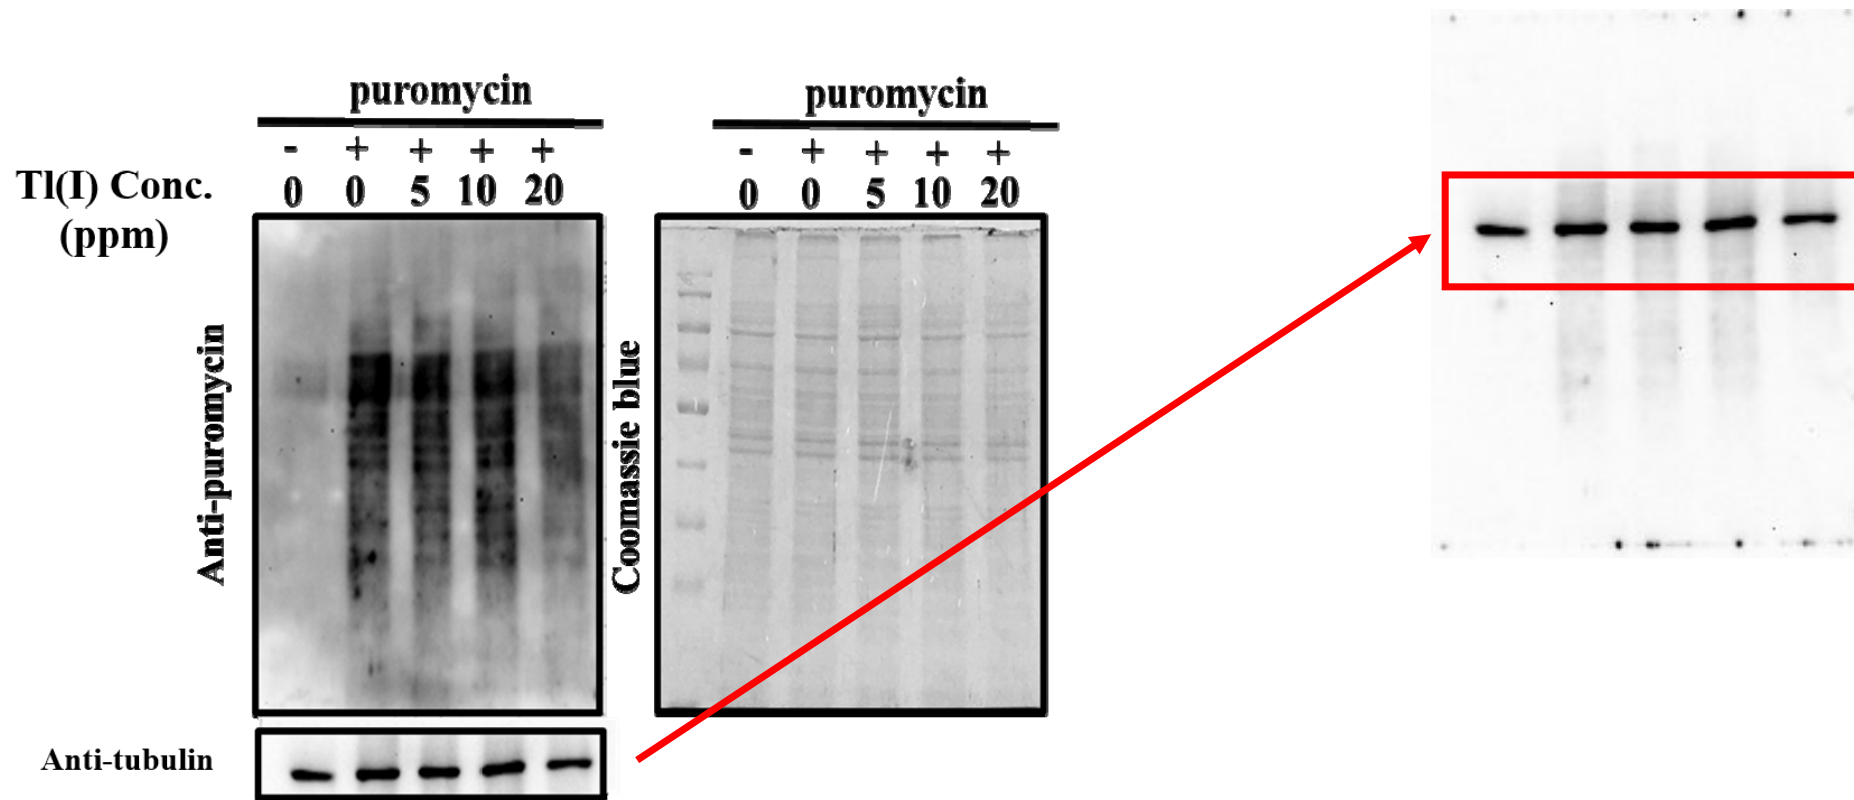

**Fig 3D**

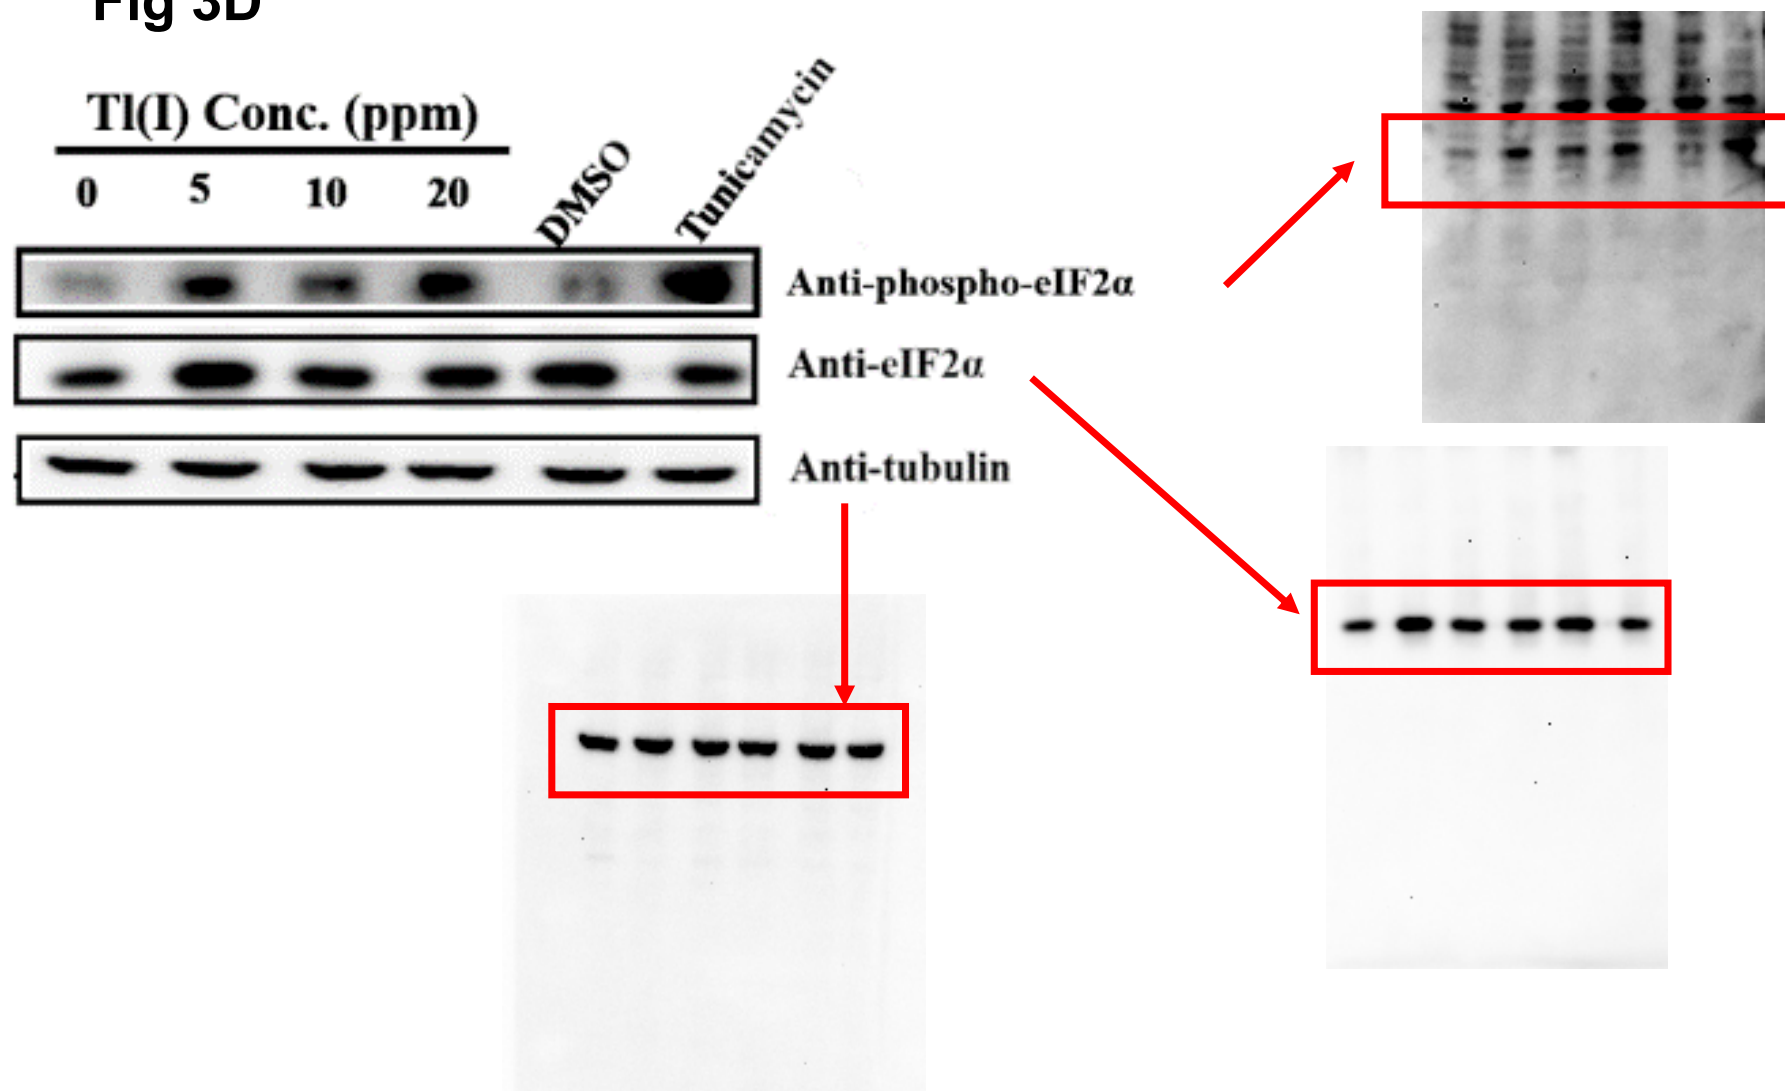

Fig 4C

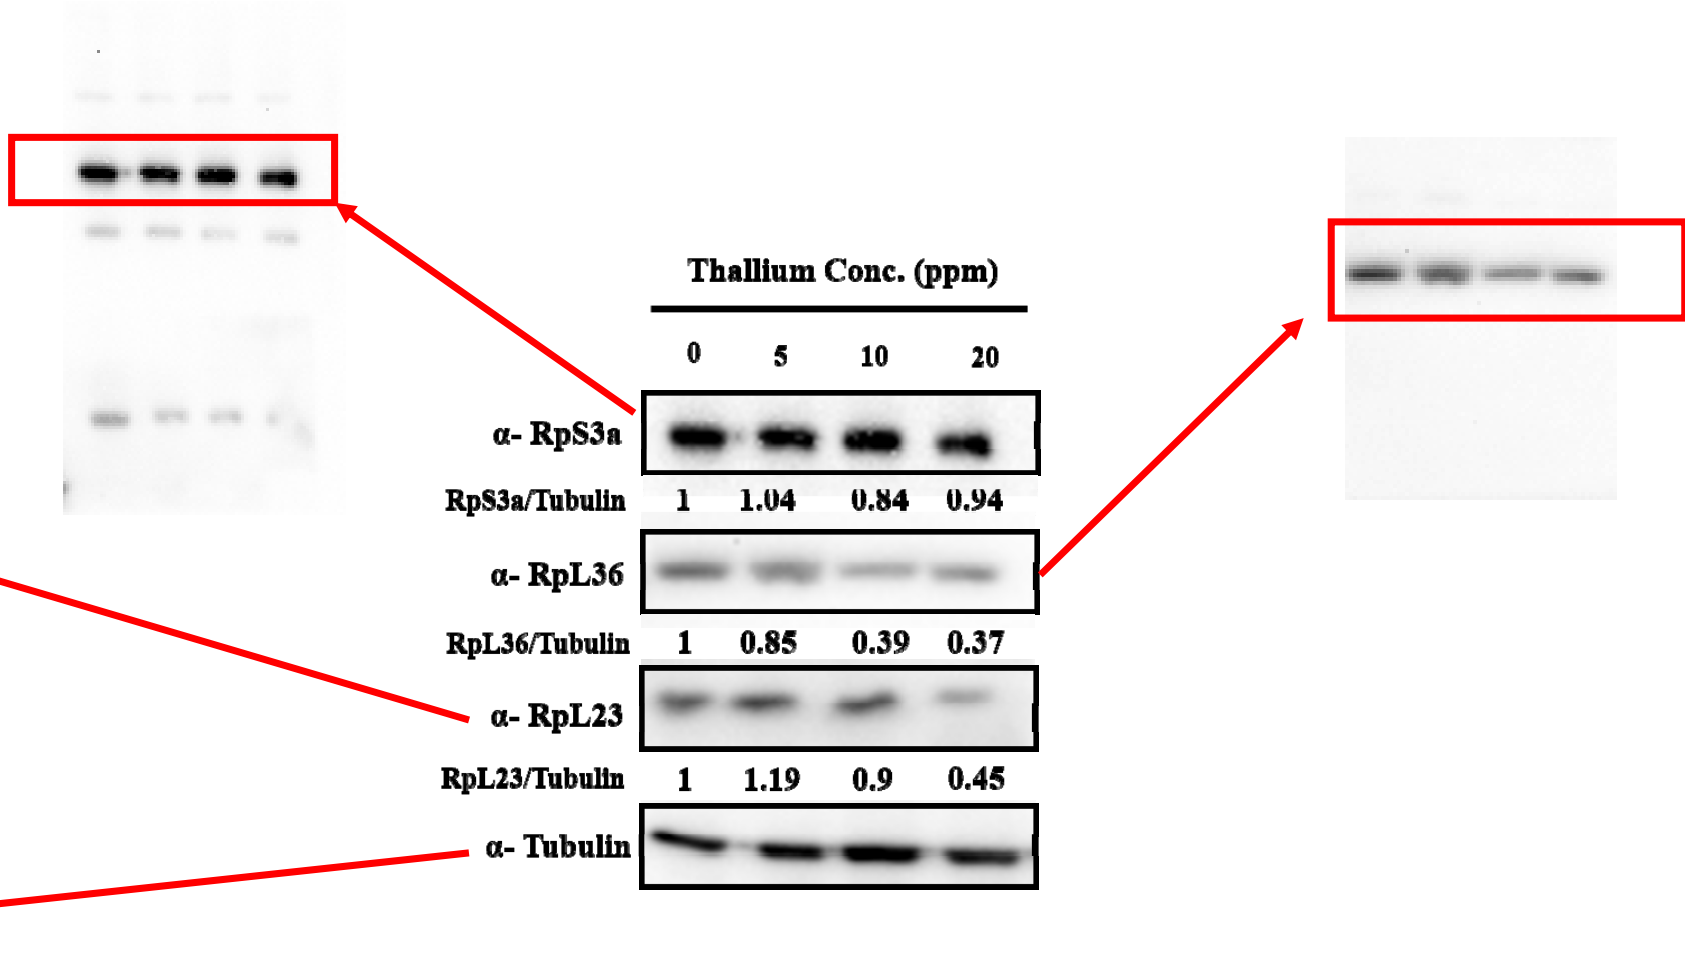

**Fig 5A**

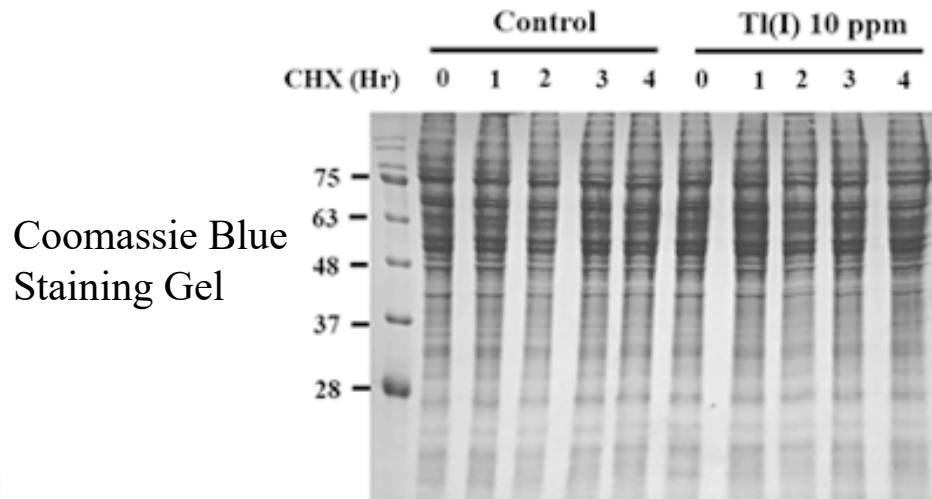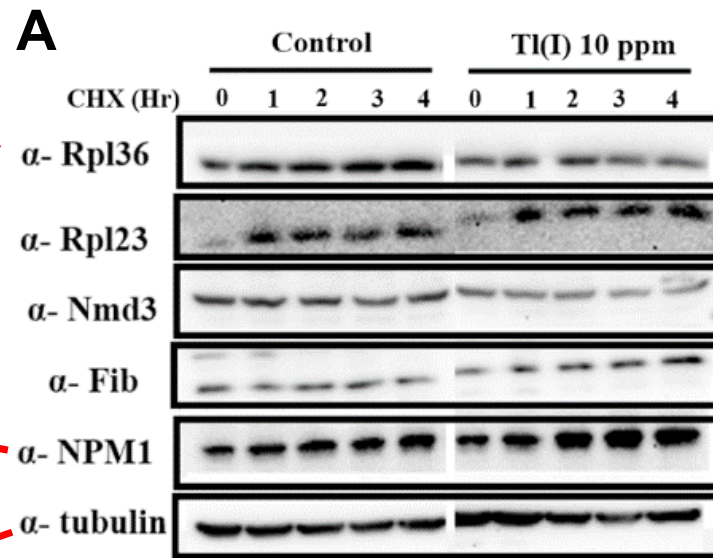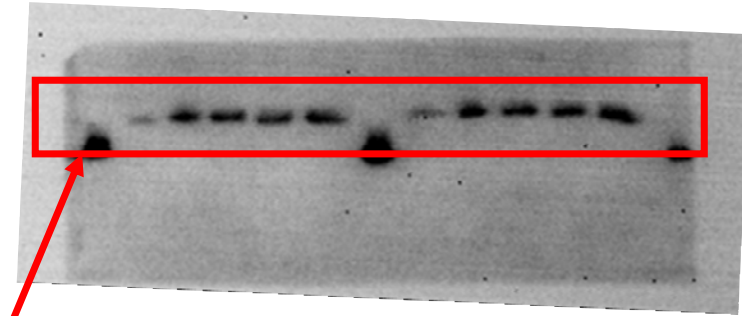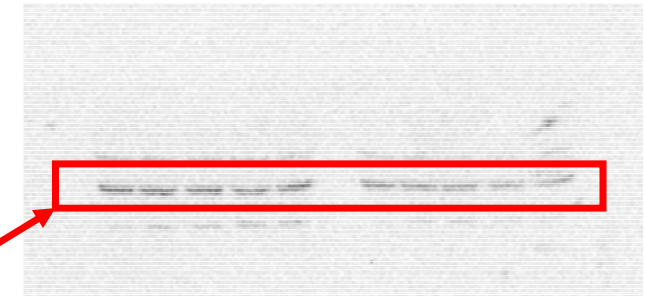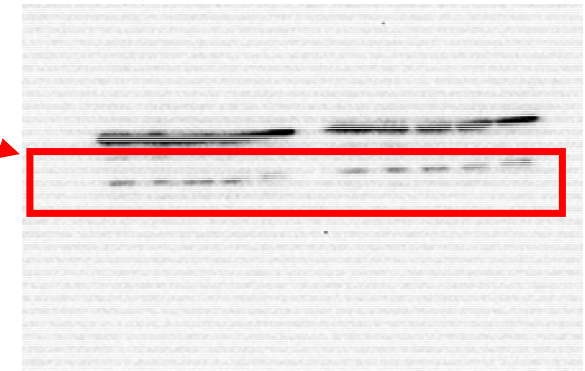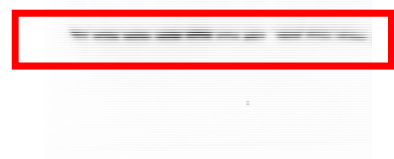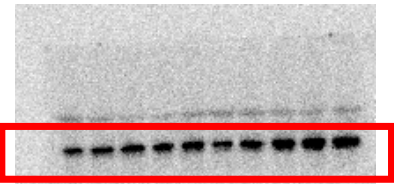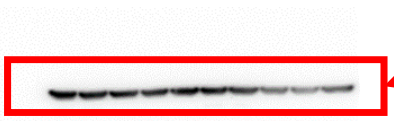

Fig 5B

**B**

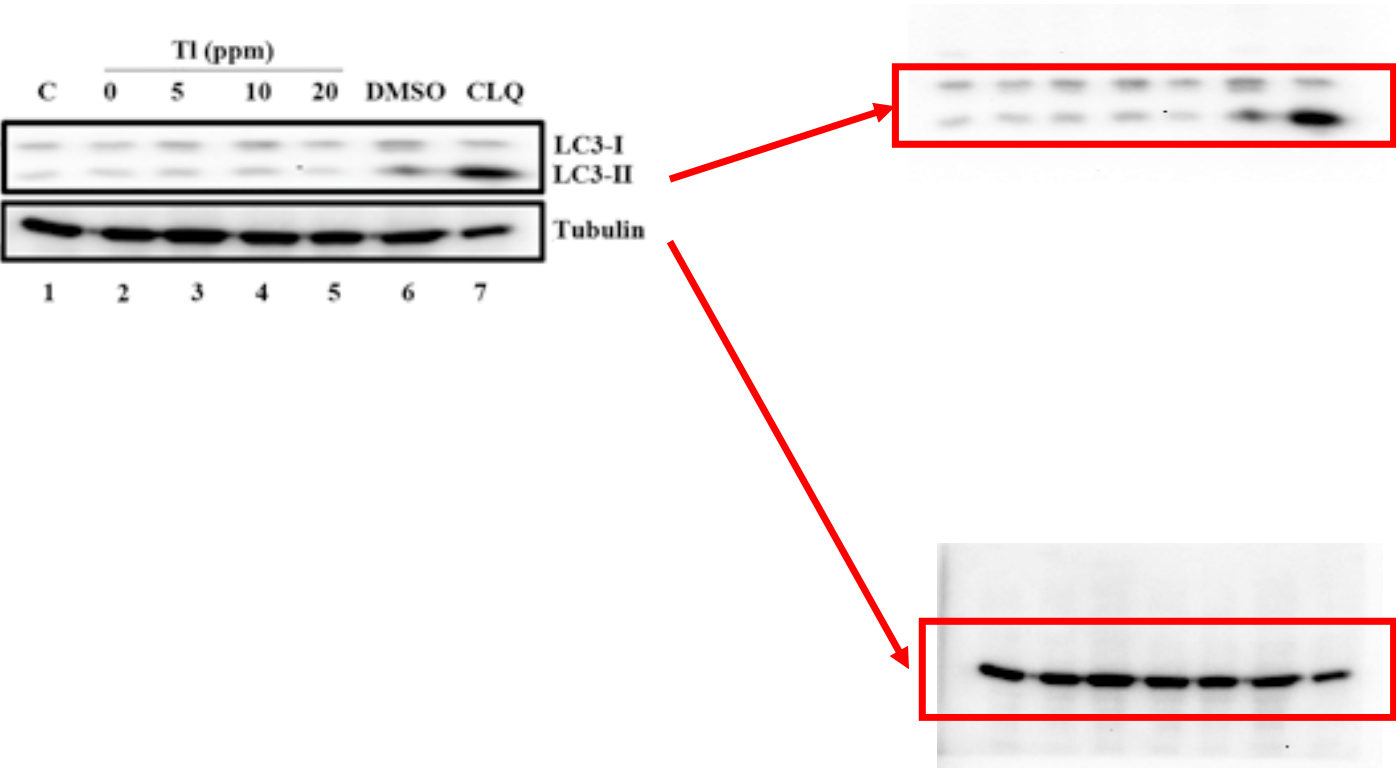



**Fig 6B**

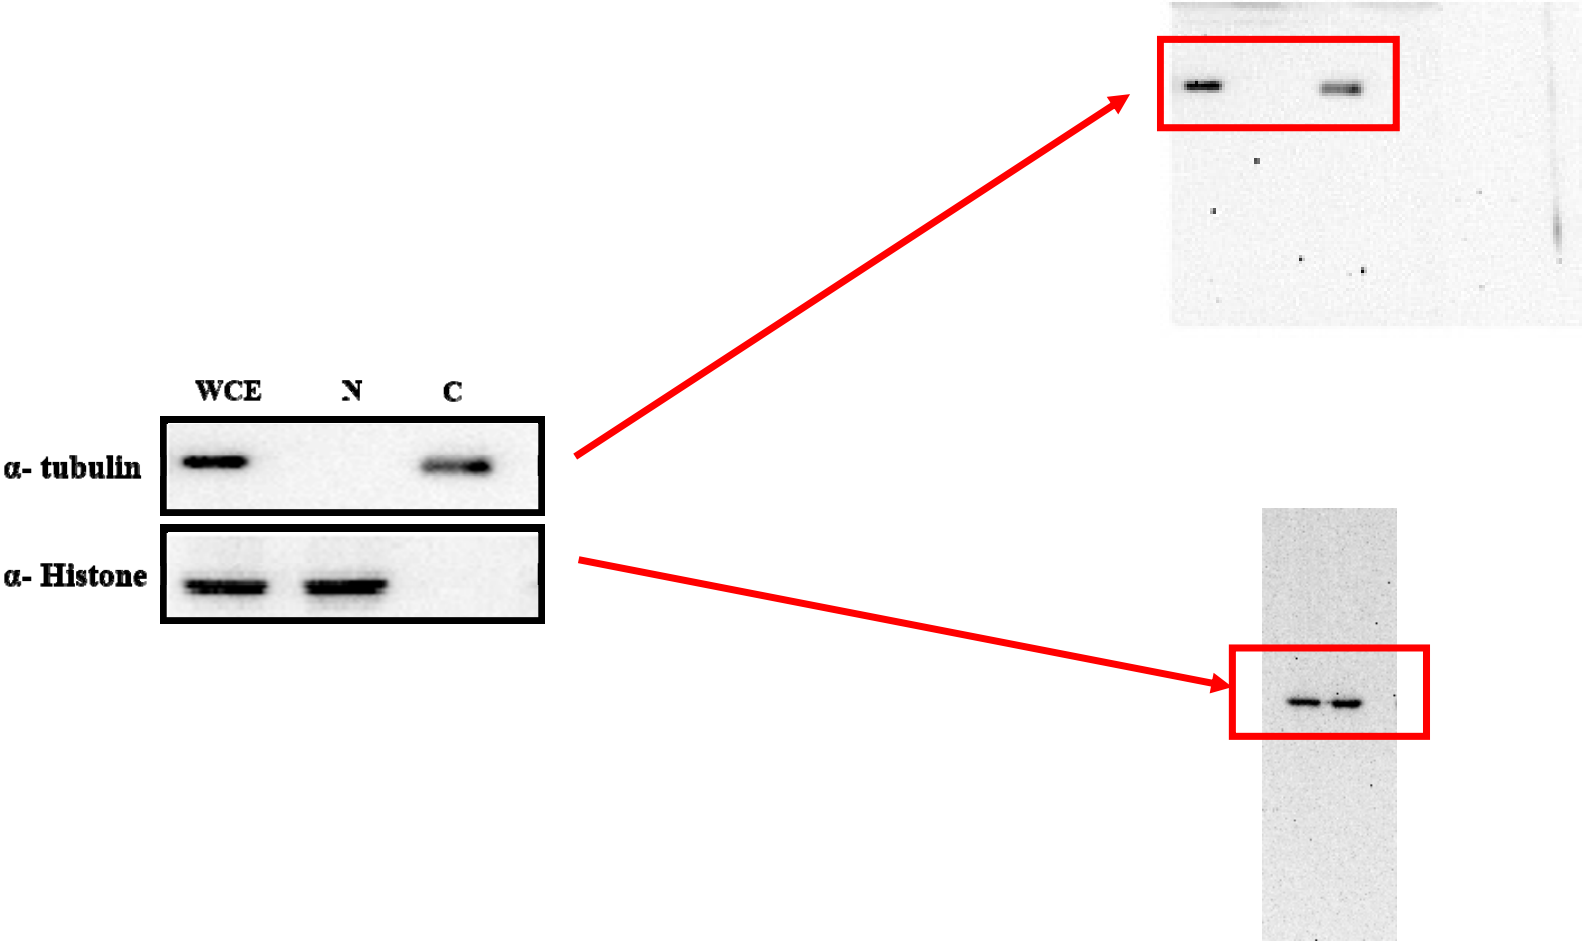



**Fig 7 S1**

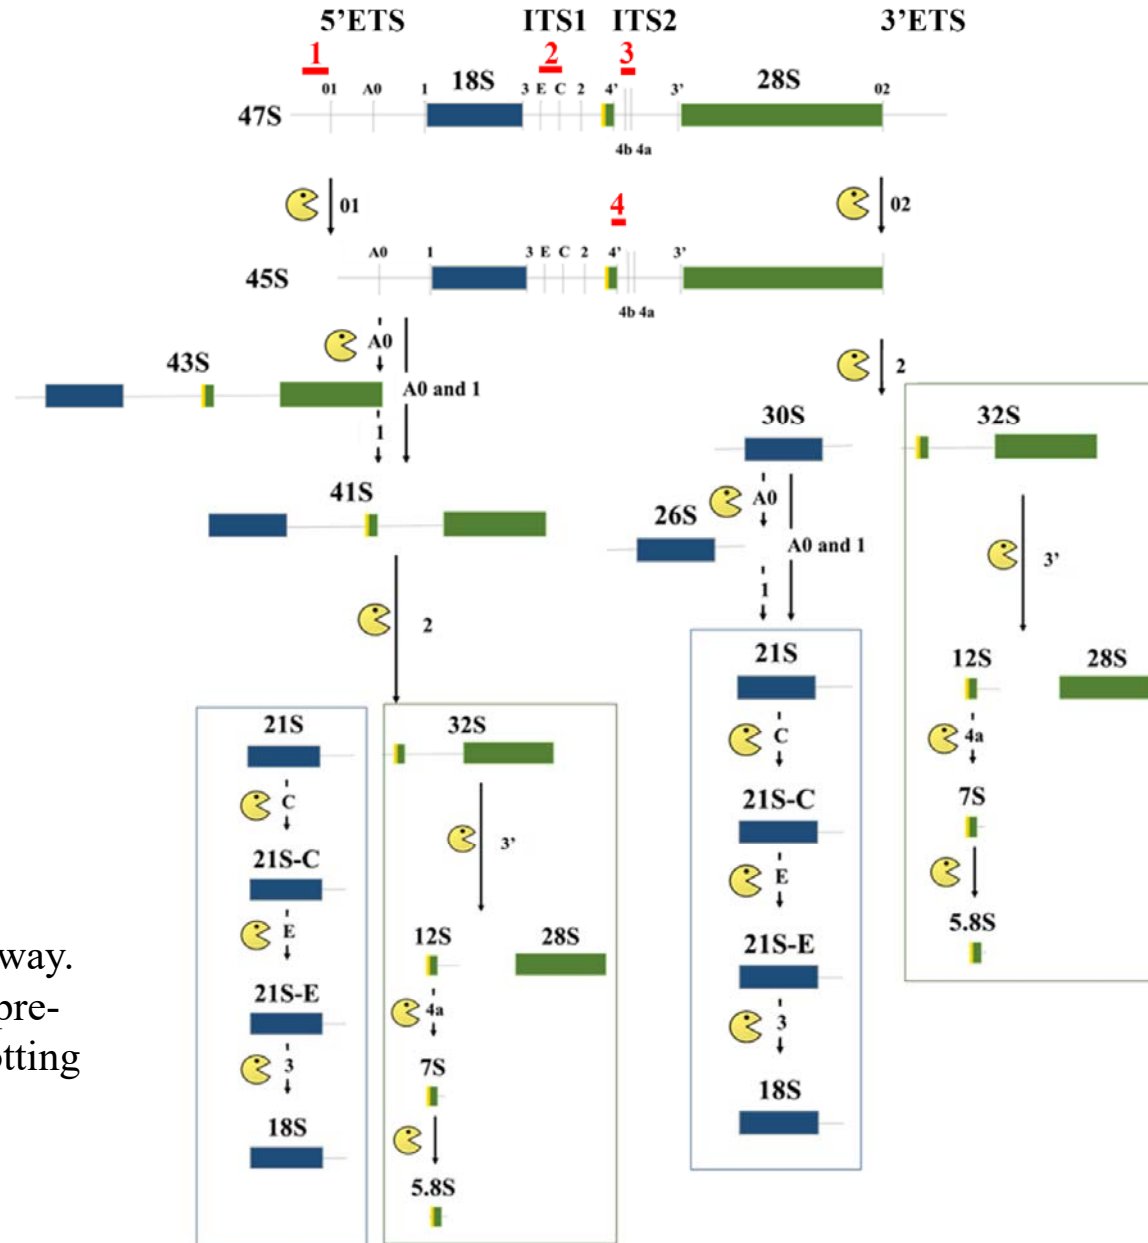

Pre-rRNA processing pathway. The probes used to detect pre-rRNAs in the Northern blotting were shown in red bars.

Fig 7D

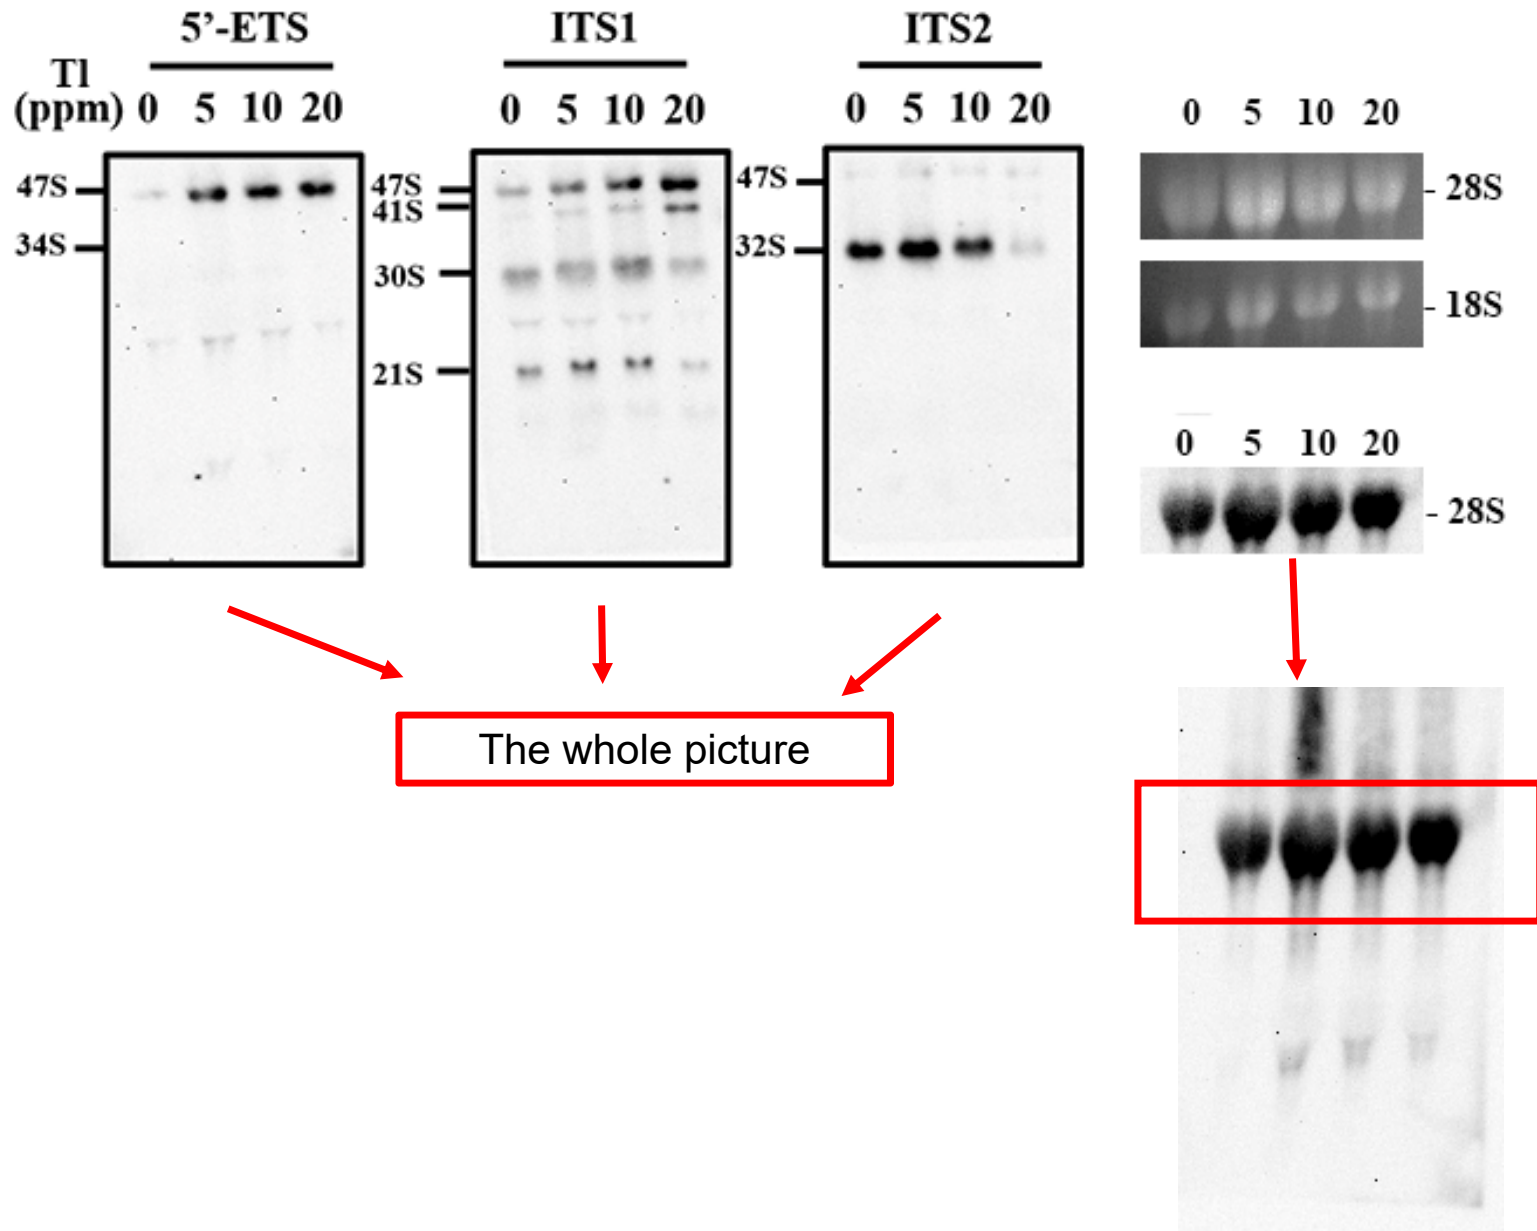

Fig 7E

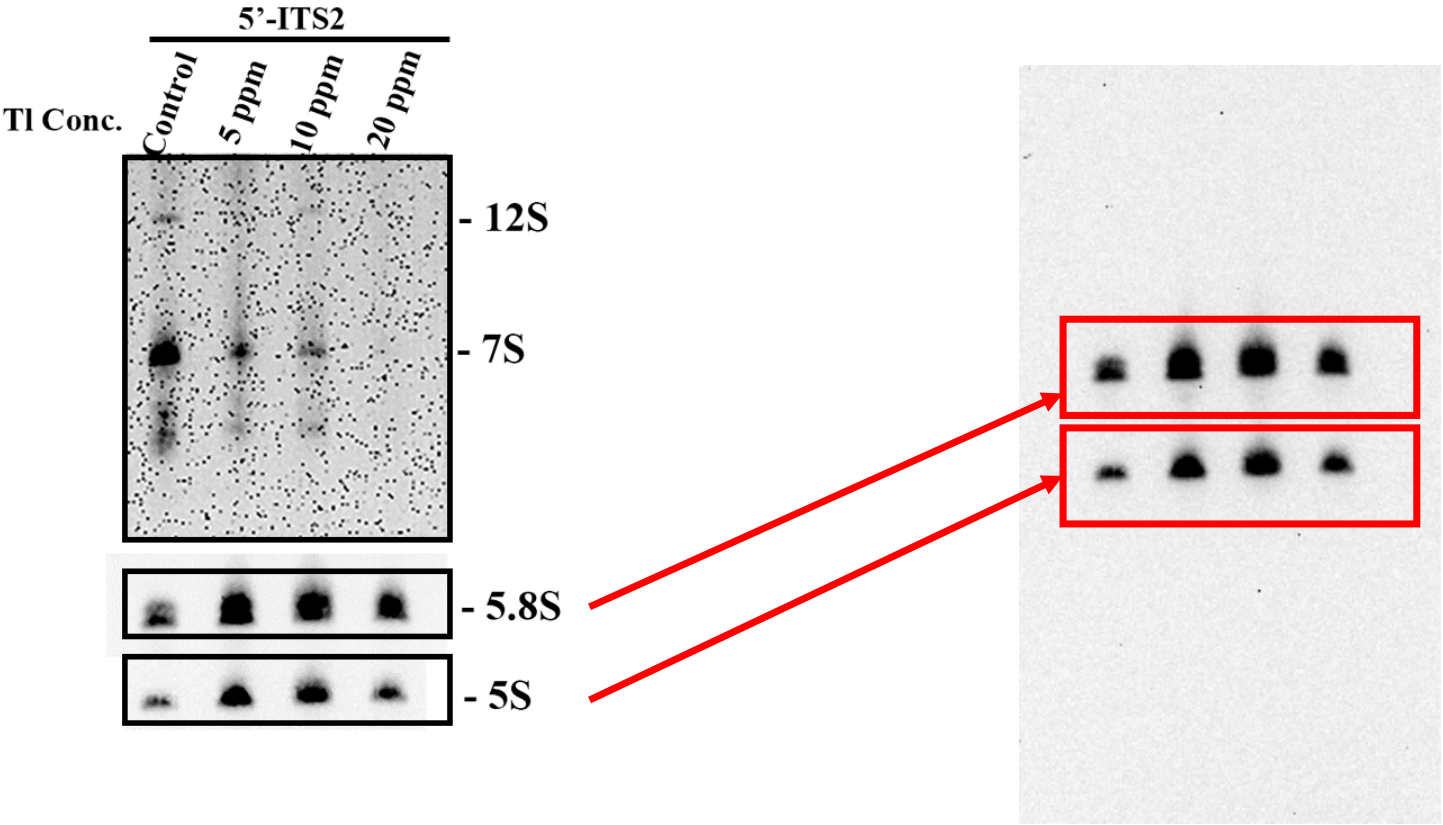

**Fig 9D**

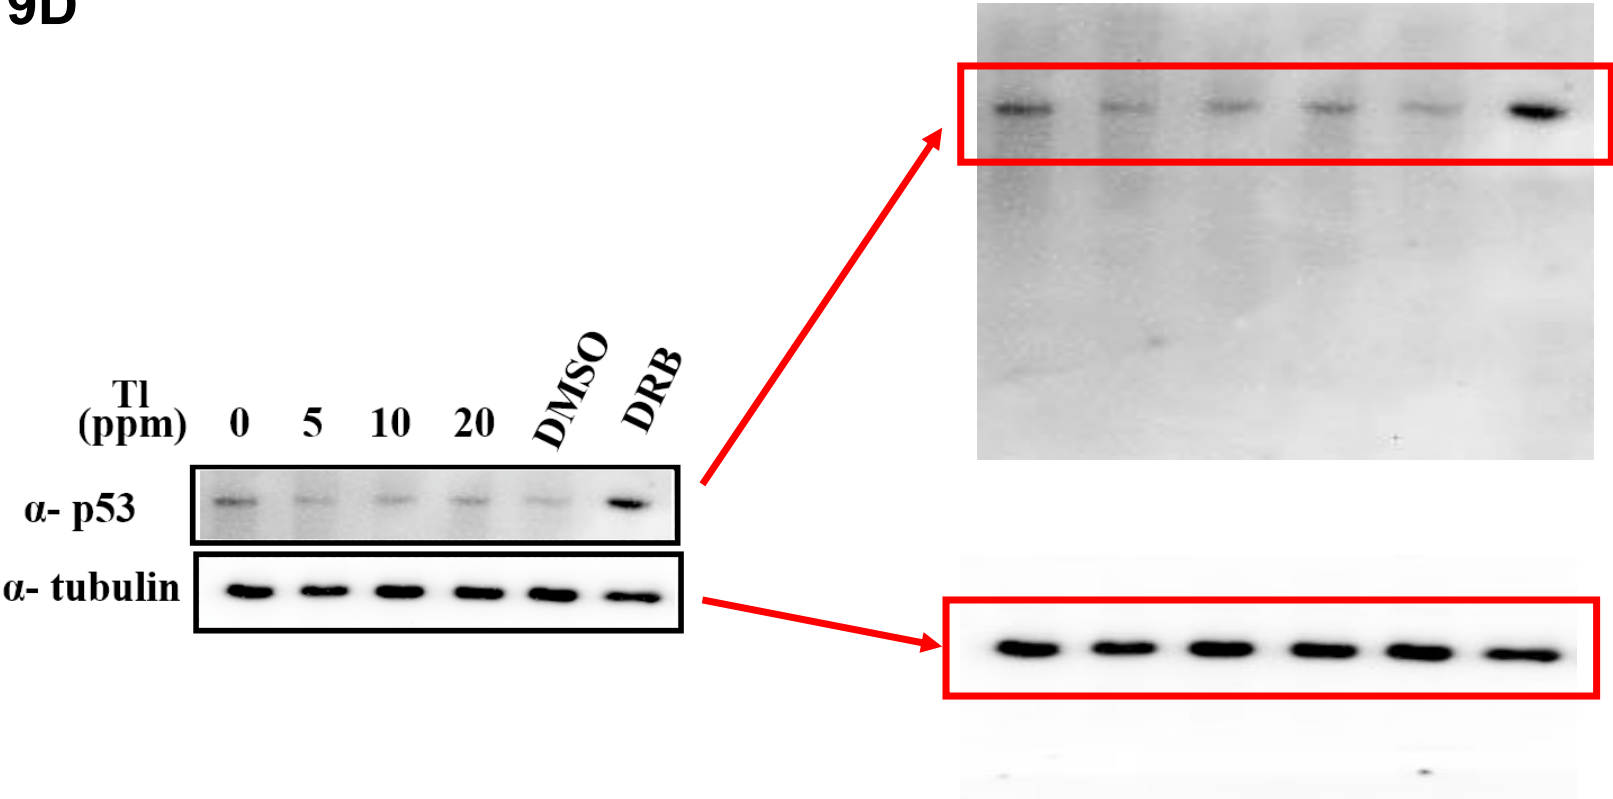

Supplement: 41598_2019_43413_MOESM1_ESM.pdf [file 41598_2019_43413_MOESM1_ESM.pdf]
